# Supplementary material for: Synthesis of hydrophobically modified berberine derivatives with high anticancer activity through modulation of the MAPK pathway
Source: Royal Society of Chemistry journal article supplement (doi:10.1039/d0nj01645d), 2020-01-01
Supplement: d0nj01645d1.pdf [file d0nj01645d1.pdf]

## Supplementary File for

### Synthesis of hydrophobically modified berberine derivatives with high anticancer activity through modulation of the MAPK pathway

Lizhen Wang,<sup>a,b</sup> Xueliang Yang,<sup>a,b</sup> Xiaobin Li,<sup>a,b</sup> Rostyslav Stoika,<sup>c</sup> Xue Wang,<sup>a,b</sup> Houwen Lin,<sup>d</sup>  
Yukui Ma,<sup>e</sup> Rongchun Wang,<sup>a,b,\*</sup> Kechun Liu<sup>a,b,\*</sup>

<sup>a</sup>*Biology Institute, Qilu University of Technology (Shandong Academy of Sciences), Jinan 250353, Shandong Province, China*

<sup>b</sup>*Engineering Research Center of Zebrafish Models for Human Diseases and Drug Screening of Shandong Province, Qilu University of Technology (Shandong Academy of Sciences), Jinan 250353, Shandong Province, China*

<sup>c</sup>*Department of Regulation of Cell Proliferation and Apoptosis, Institute of Cell Biology, National Academy of Sciences of Ukraine, Lviv, Ukraine*

<sup>d</sup>*Research Center for Marine Drugs, State Key Laboratory of Oncogenes and Related Genes, Shanghai Jiao Tong University, Shanghai 200127, China*

<sup>e</sup>*Shandong Provincial Key Laboratory of Chemical Drugs, Shandong Academy of Pharmaceutical Sciences, 250101 Jinan, China*

## Table of Contents

|                                                                        |        |
|------------------------------------------------------------------------|--------|
| <sup>1</sup> H, <sup>13</sup> C NMR spectra of compound <b>2</b> ----- | pageS2 |
| <sup>1</sup> H, <sup>13</sup> C NMR spectra of compound <b>3</b> ----- | pageS3 |
| <sup>1</sup> H, <sup>13</sup> C NMR spectra of compound <b>4</b> ----- | pageS4 |
| <sup>1</sup> H, <sup>13</sup> C NMR spectra of compound <b>5</b> ----- | pageS5 |
| <sup>1</sup> H, <sup>13</sup> C NMR spectra of compound <b>6</b> ----- | pageS6 |
| <sup>1</sup> H, <sup>13</sup> C NMR spectra of compound <b>7</b> ----- | pageS7 |
| <sup>1</sup> H, <sup>13</sup> C NMR spectra of compound <b>8</b> ----- | pageS8 |

---

\* Corresponding author. Tel.: +86 0531 82605331; fax: +86 0531 82605331 e-mail: [lwangrongchun@163.com](mailto:lwangrongchun@163.com)

\* Corresponding author. Tel.: +86 0531 82605331; fax: +86 0531 82605331 e-mail: [liukechun2000@163.com](mailto:liukechun2000@163.com)

†Electronic supplementary information (ESI) available. See

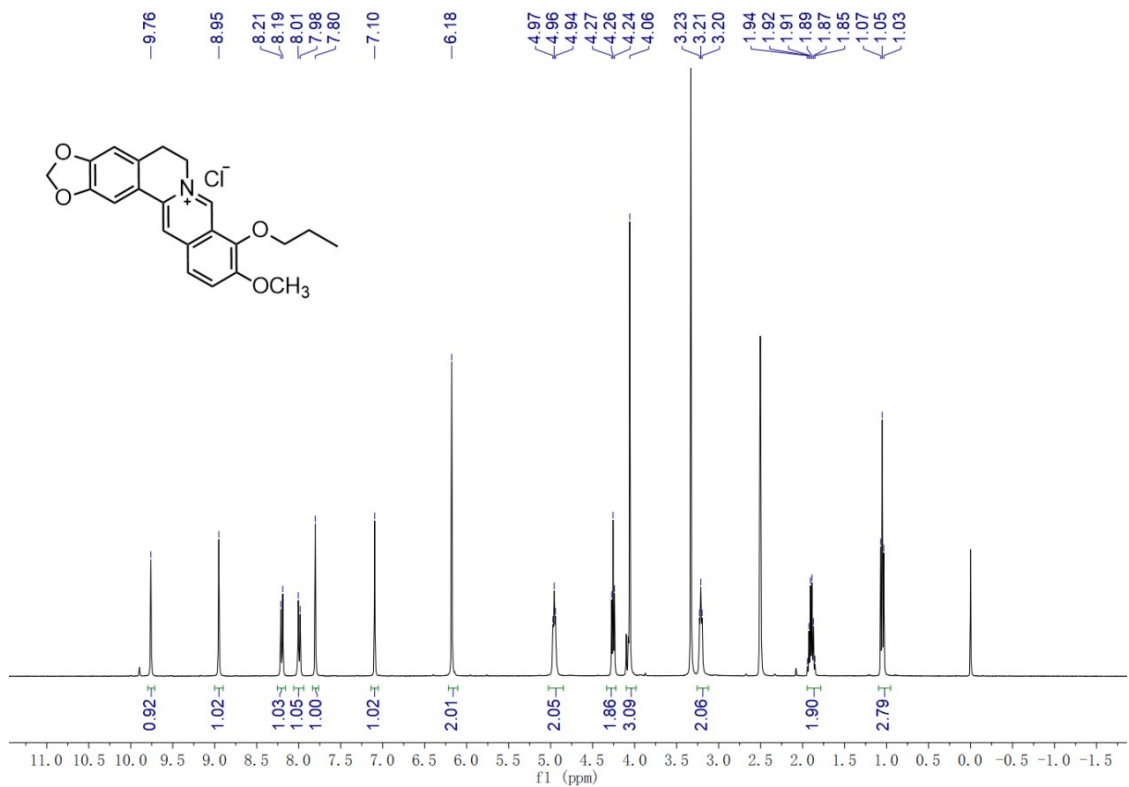

**<sup>1</sup>H NMR spectrum of compound 2**

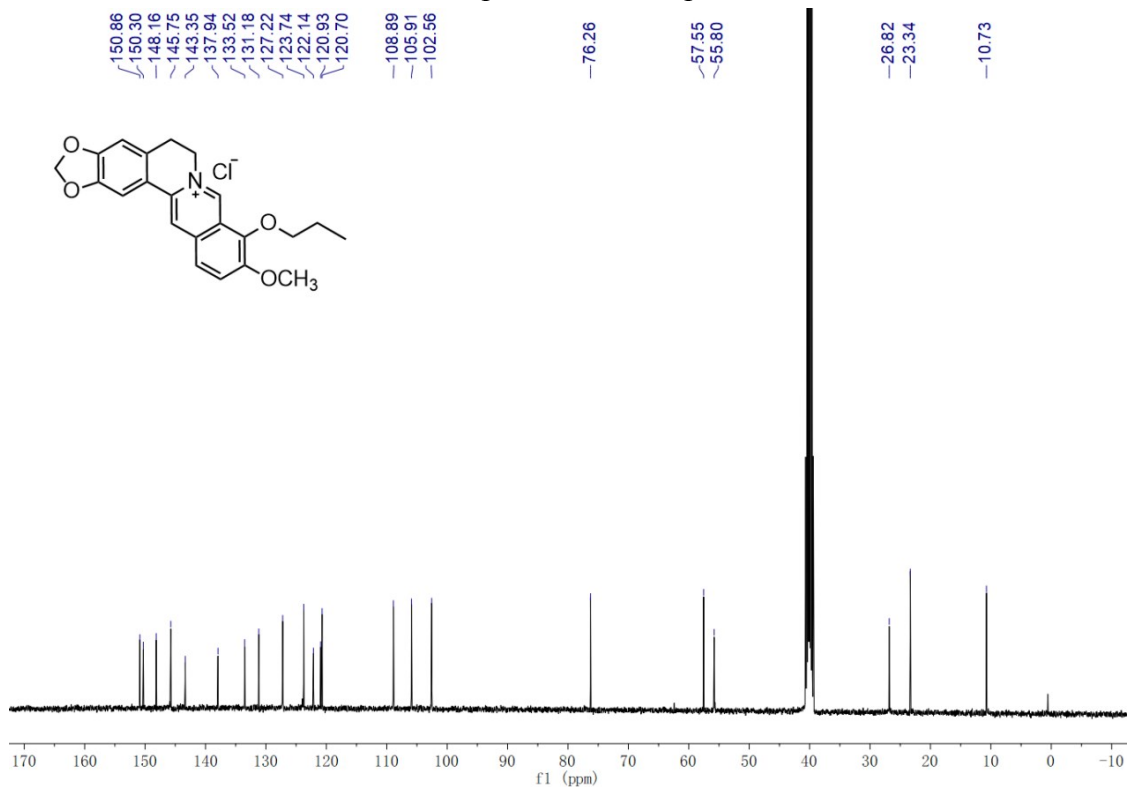

**<sup>13</sup>C NMR spectrum of compound 2**

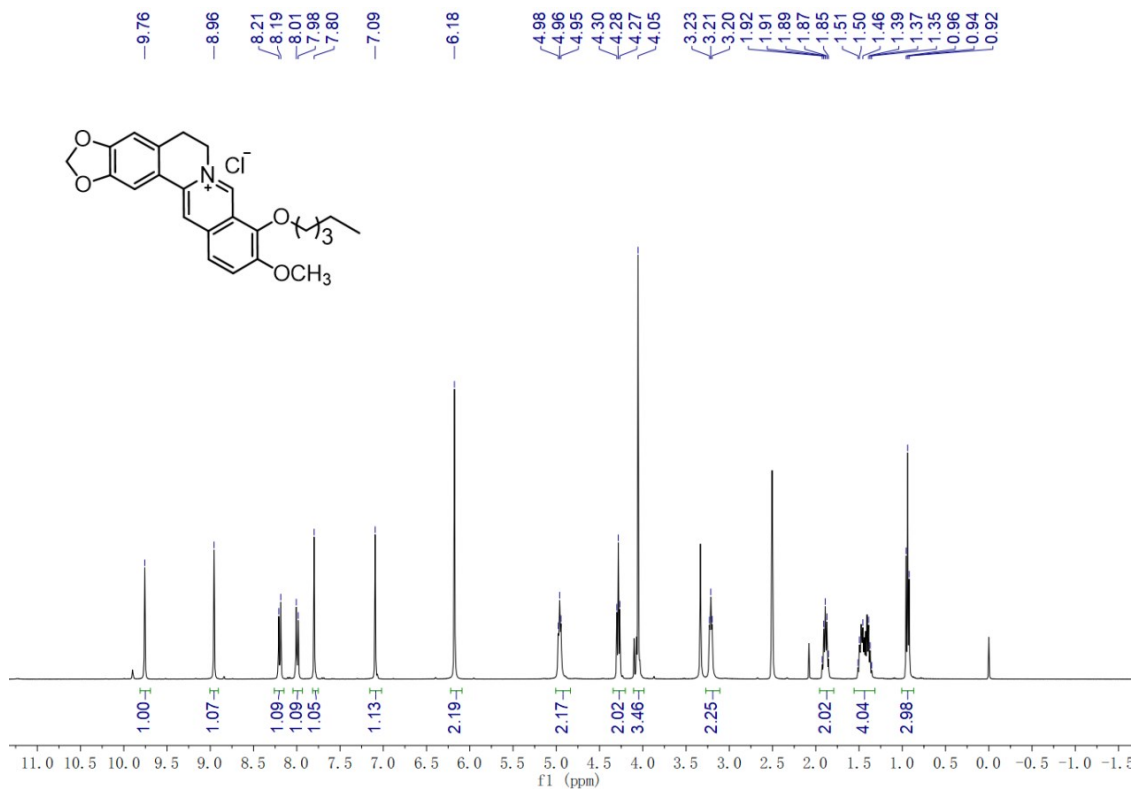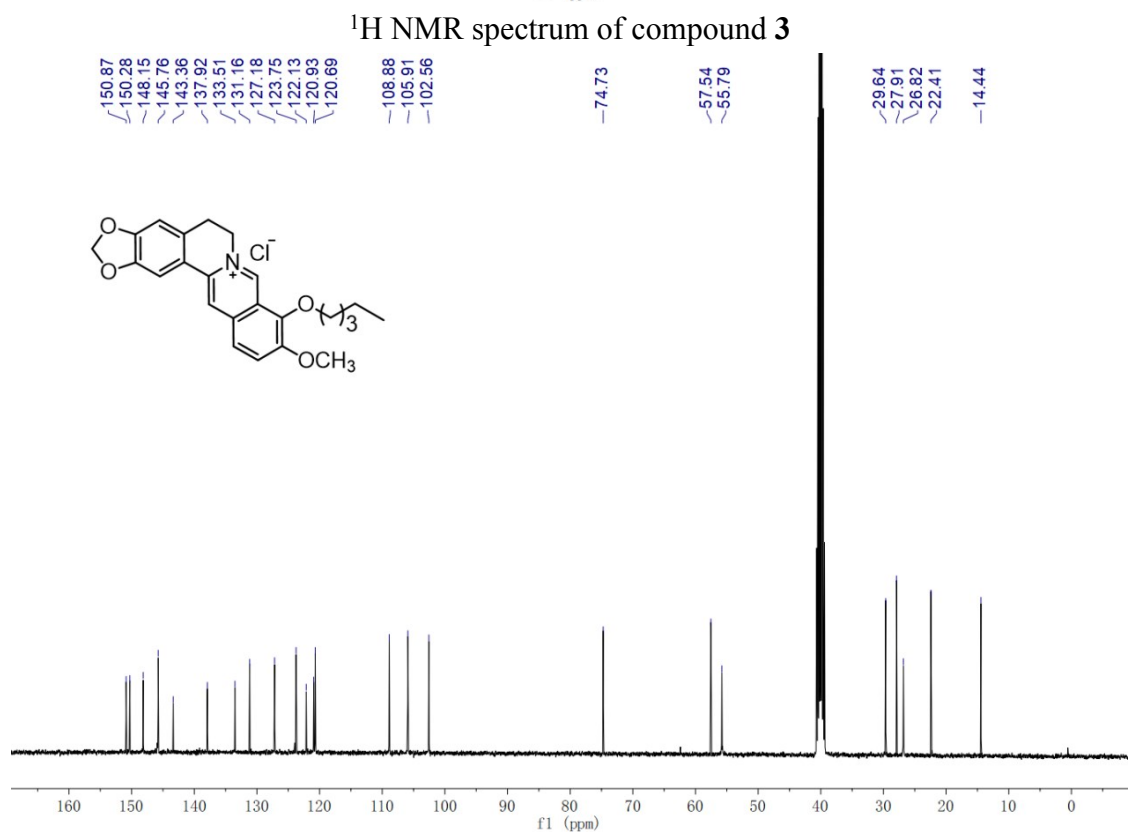

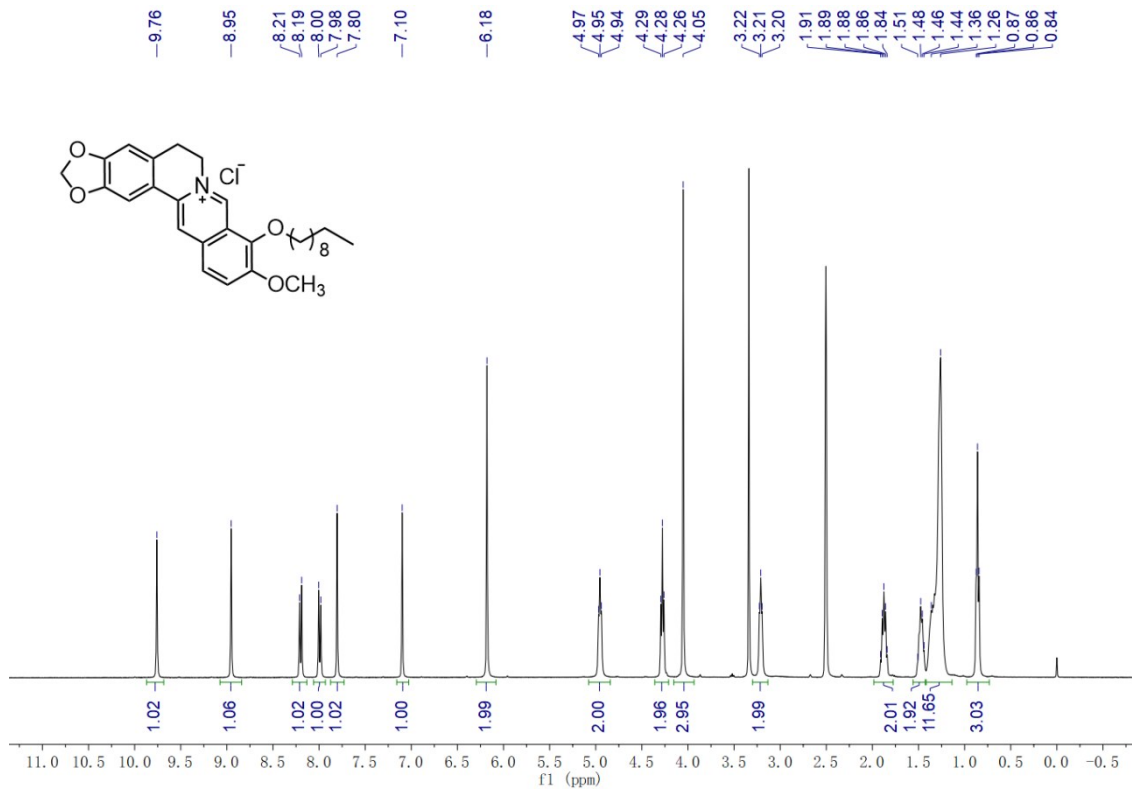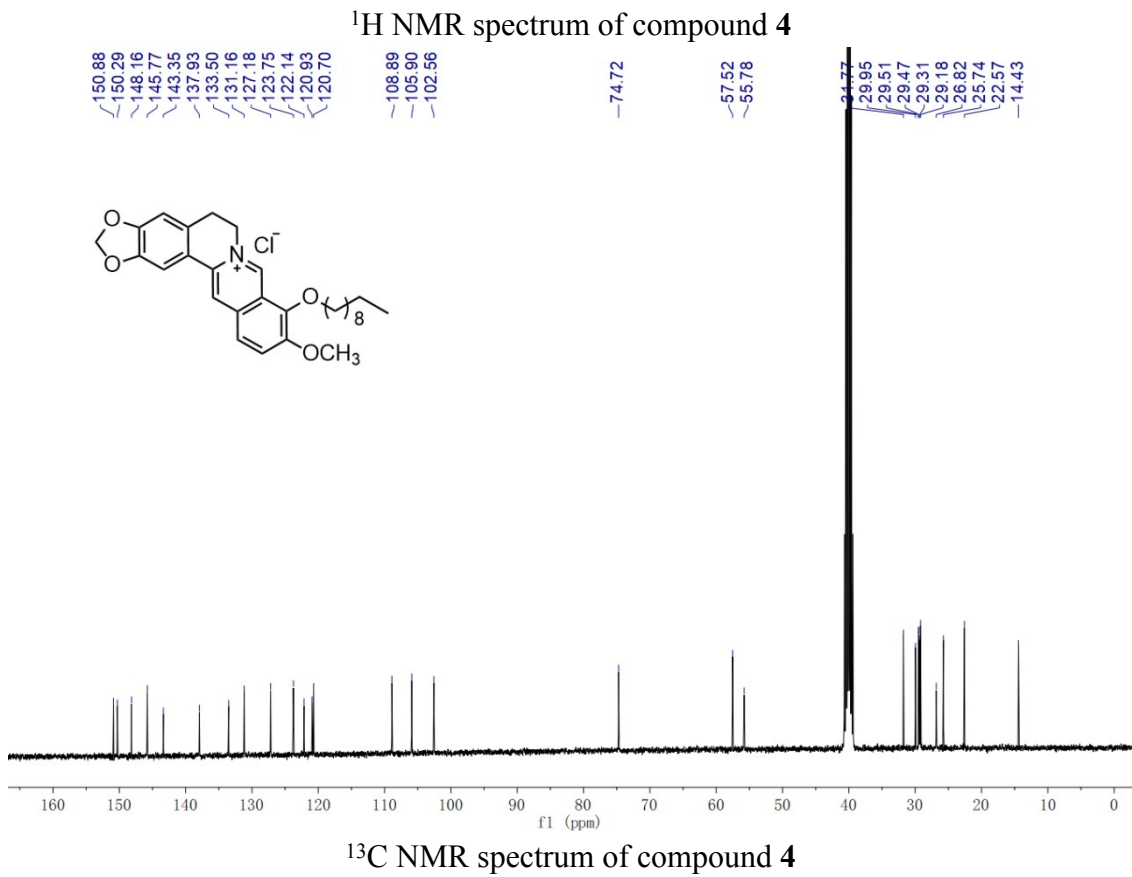

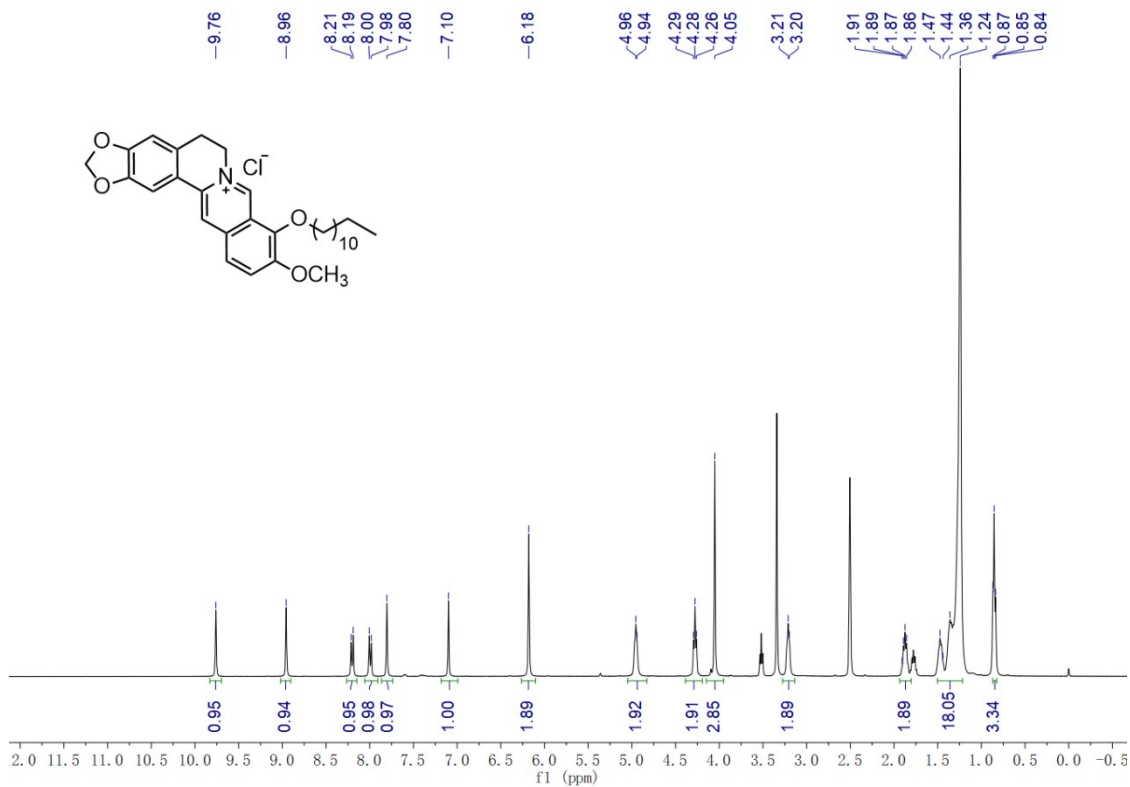

<sup>1</sup>H NMR spectrum of compound 5

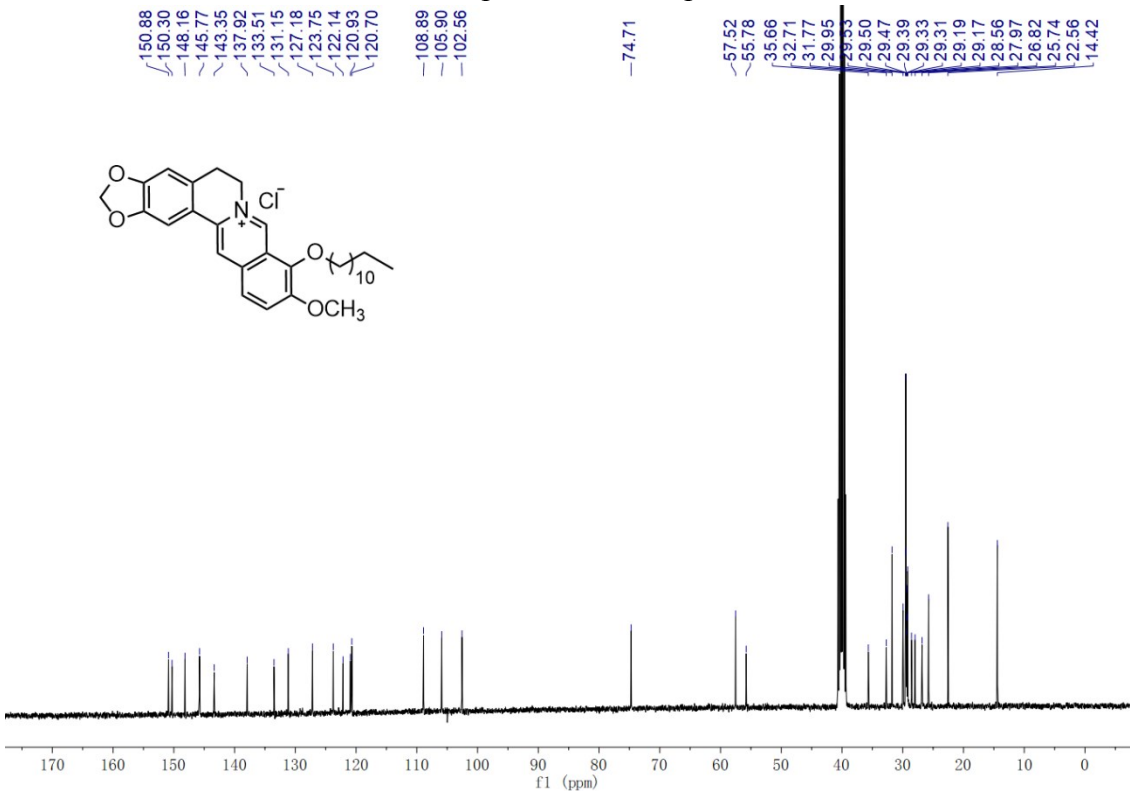

<sup>13</sup>C NMR spectrum of compound 5

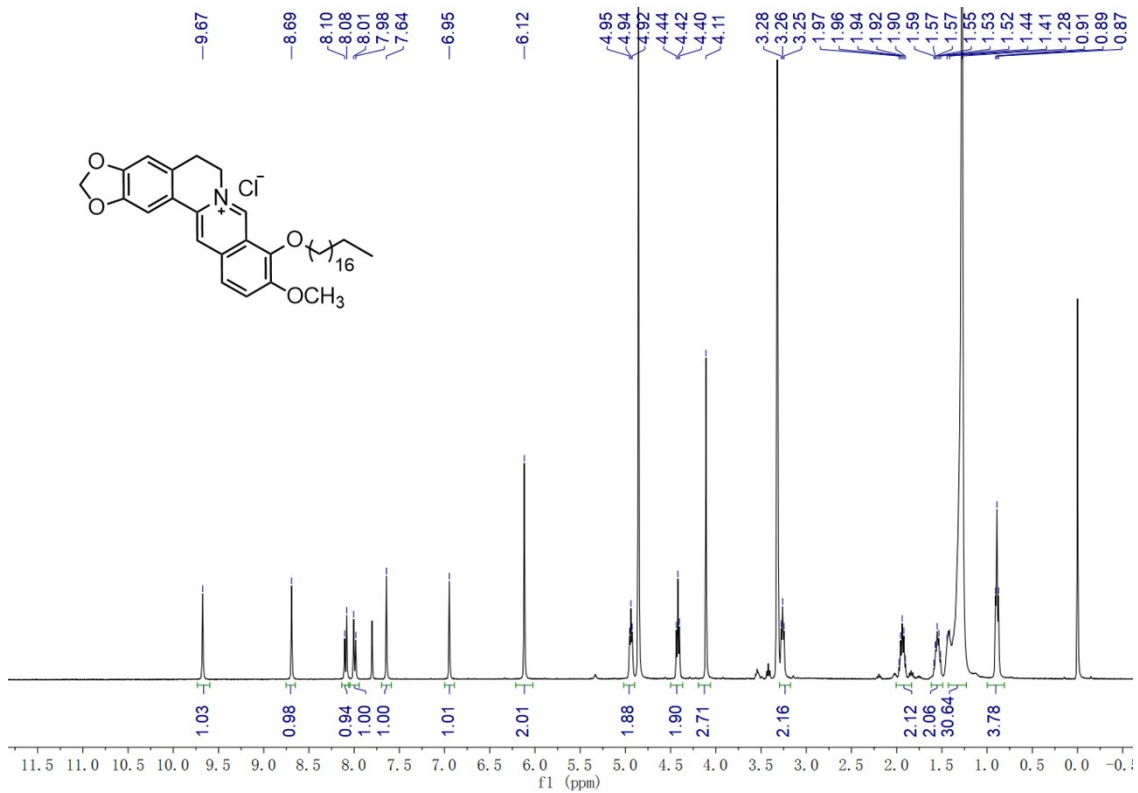

<sup>1</sup>H NMR spectrum of compound 6

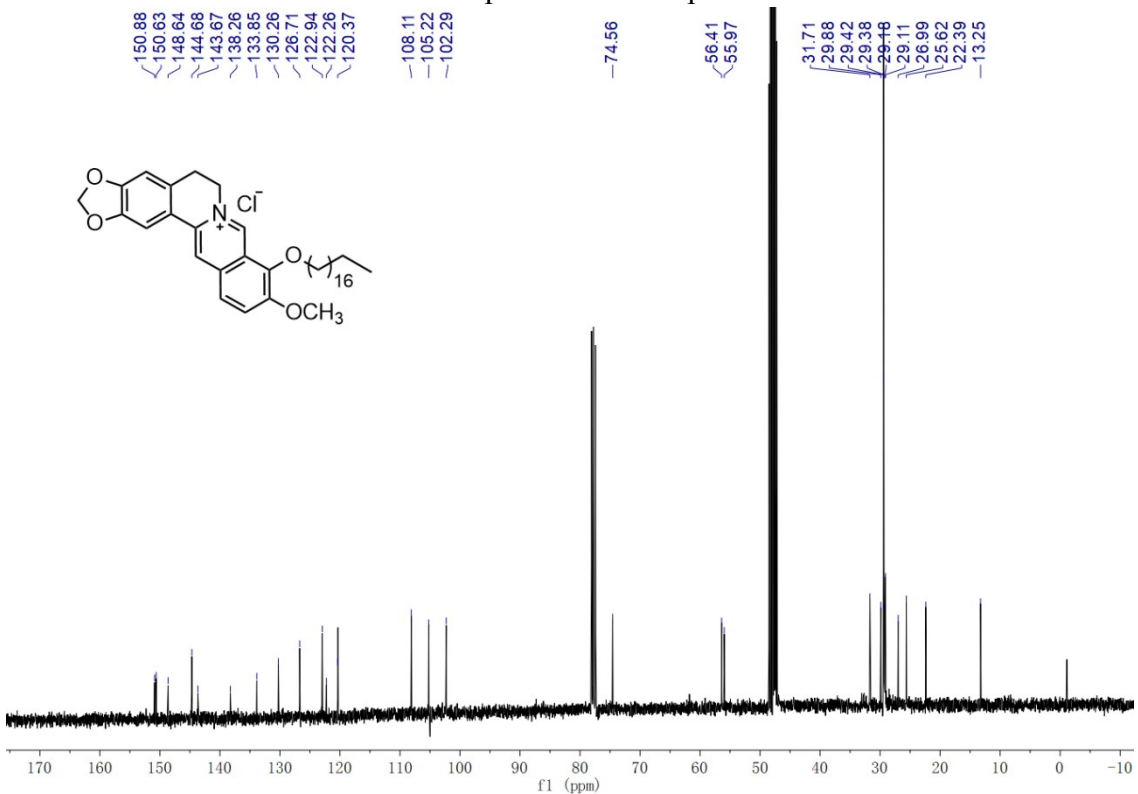

<sup>13</sup>C NMR spectrum of compound 6

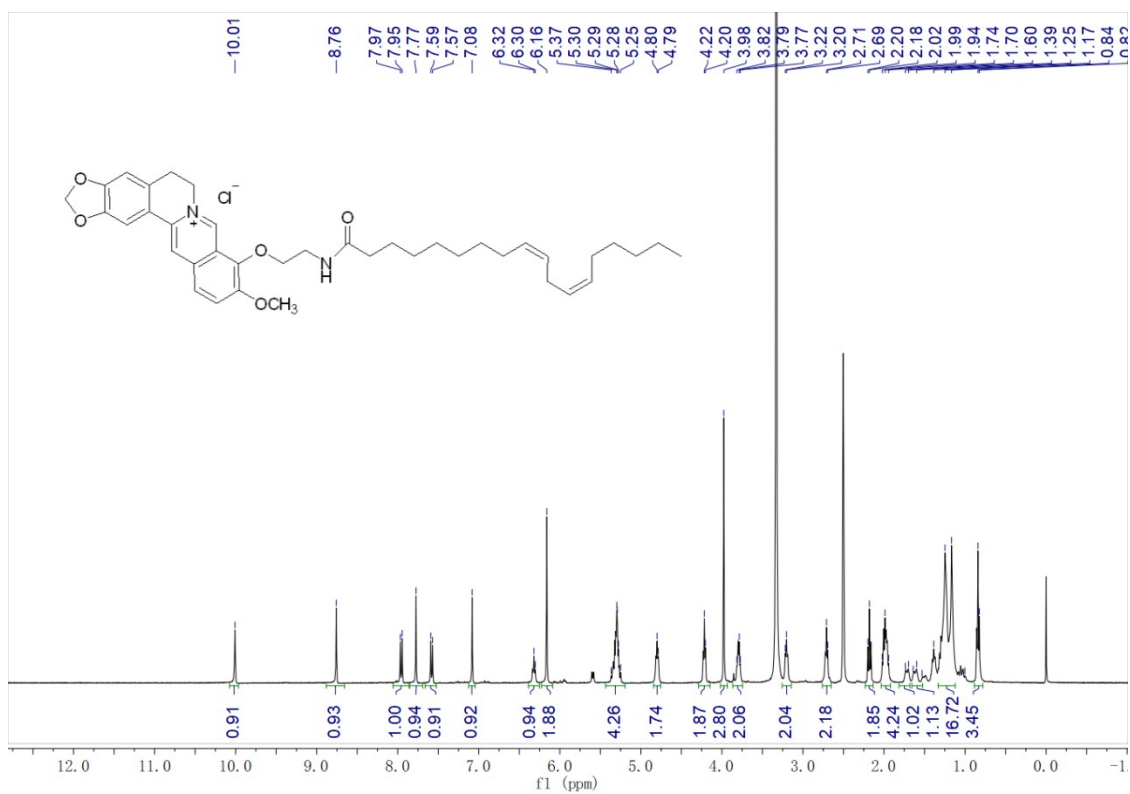

<sup>1</sup>H NMR spectrum of compound 7

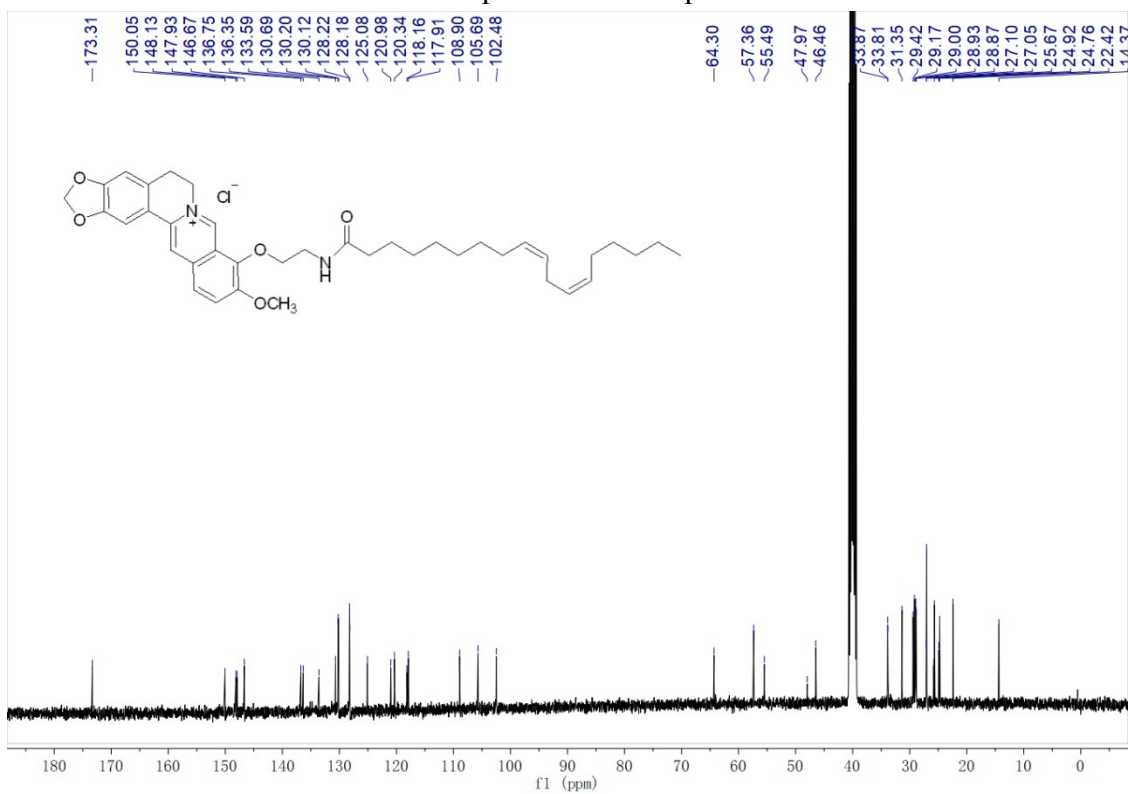

<sup>13</sup>C NMR spectrum of compound 7

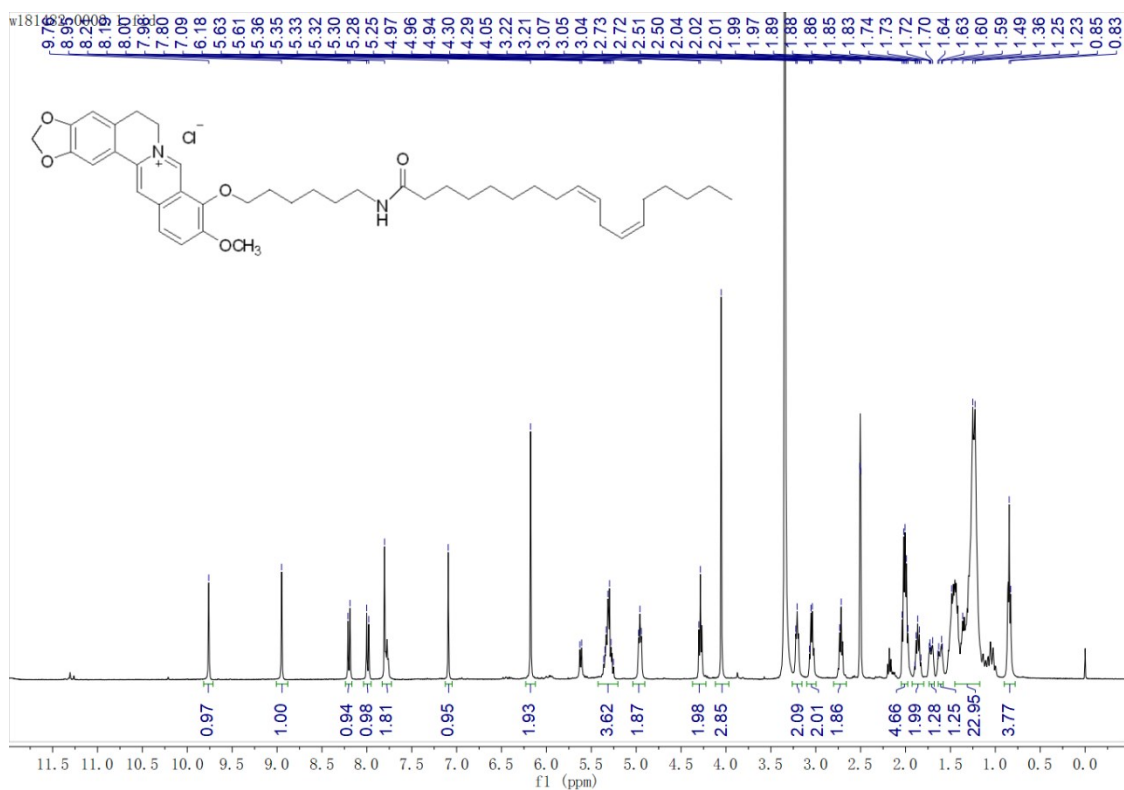

**<sup>1</sup>H NMR spectrum of compound 8**

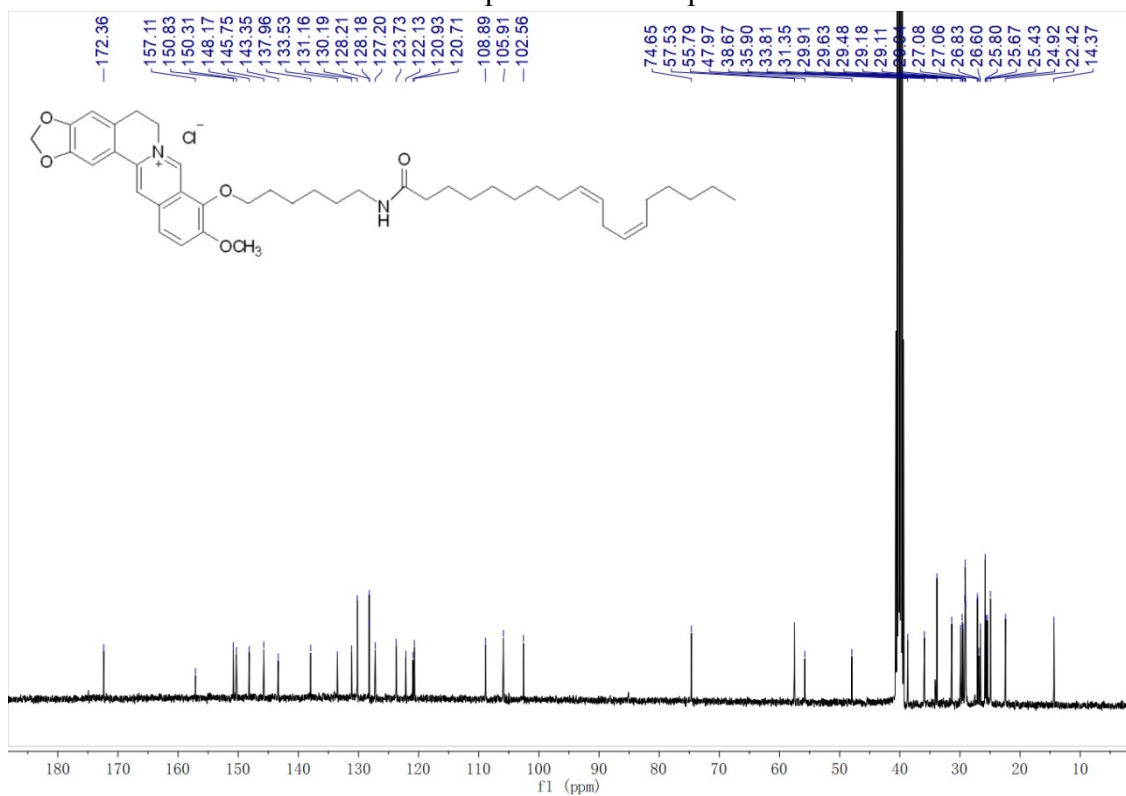

**<sup>13</sup>C NMR spectrum of compound 8**
